# Supplementary material
Source: Springer Nature journal article supplement (https://www.springermedizin.de/resource/supplementary/12884_2011_473_MOESM5_ESM.pdf/9457766)
Supplement: MOESM5 [file 9457766]

**TABLE 4: RESULT OF MULTIVARIATE ANALYSIS LOGISTIC REGRESSION**

| EXPLANATORY VARIABLES                 | UNDER-5 |         |               |
|---------------------------------------|---------|---------|---------------|
|                                       | OR      | P-value | (C.I)         |
| <b>Maternal factors</b>               |         |         |               |
| <b>Maternal education</b>             |         |         |               |
| No education                          | 1.00    | -       | (-)           |
| Primary                               | 0.98    | 0.742   | (0.84 – 1.13) |
| Secondary or higher                   | 1.13    | 0.232   | (0.92 – 1.38) |
| <b>Parity</b>                         |         |         |               |
| 1                                     | 1.00    | -       | (-)           |
| 2, 3 and 4                            | ***     | ***     | (-)           |
| ≥5                                    | ***     | ***     | (-)           |
| <b>Marital status</b>                 | ***     | ***     | (-)           |
| <b>Maternal age</b>                   |         |         |               |
| ≤ 20 years                            | 1.00    | -       | (-)           |
| 21 – 25 years                         | 1.23    | 0.113   | (0.95 – 1.58) |
| 26 – 30 years                         | 1.70    | 0.001   | (1.30 – 2.22) |
| 31 – 35 years                         | 2.48    | 0.001   | (1.84 – 3.33) |
| > 35 years                            | 2.87    | 0.001   | (2.10 – 3.91) |
| <b>Maternal age at first marriage</b> |         |         |               |
| < 15 years                            | 1.00    | -       | (-)           |
| 15 – 19 years                         | ***     | ***     | (-)           |
| 20 – 24 years                         | 0.80    | 0.001   | (0.70 – 0.90) |
| ≥ 25 years                            | 0.70    | 0.001   | (0.57 – 0.85) |
| <b>Family planning</b>                |         |         |               |
| No method                             | 1.00    | -       | (-)           |
| Traditional                           | 0.69    | 0.017   | (0.51 – 0.85) |
| Modern                                | ***     | ***     | (-)           |
| <b>Health Seeking Behaviour</b>       |         |         |               |
| Low                                   | 1.00    | -       | (-)           |
| Average                               | 0.06    | 0.001   | (0.05 – 0.07) |
| High                                  | 1.00    | 0.951   | (0.88 – 1.12) |
| <b>Preceding birth interval</b>       |         |         |               |
| < 18 months                           | 1.00    | -       | (-)           |
| 18 – 36 months                        | 0.30    | 0.001   | (0.26 – 0.34) |
| > 36 months                           | 0.09    | 0.001   | (0.07 – 0.10) |
| <b>Breastfeeding</b>                  |         |         |               |
| < 6 months                            | 1.00    | -       | (-)           |
| 6 – 12 months                         | 1.00    | 0.955   | (0.67 – 1.50) |
| >12 – 18 months                       | 0.90    | 0.373   | (0.71 – 1.14) |
| >18 months                            | 0.43    | 0.001   | (0.35 – 0.53) |
| <b>Child factors</b>                  |         |         |               |
| <b>Sex</b>                            |         |         |               |
| Male                                  | 1.00    | -       | (-)           |
| Female                                | 1.04    | 0.547   | (0.92 – 1.17) |
| <b>Birth order</b>                    |         |         |               |
| 1                                     | 1.00    | -       | (-)           |

| EXPLANATORY VARIABLES                | UNDER-5 |         |               |
|--------------------------------------|---------|---------|---------------|
|                                      | OR      | P-value | (C.I)         |
| 2, 3 or 4                            | 1.93    | 0.001   | (1.56 – 2.37) |
| ≥5                                   | ***     | ***     | (-)           |
| <b>Birth weight</b>                  |         |         |               |
| Normal                               | 1.00    | -       | (-)           |
| Large                                | 1.08    | 0.438   | (0.87 – 1.27) |
| Small                                | 1.31    | 0.004   | (1.09 – 1.58) |
| <b>Paternal &amp; family factors</b> |         |         |               |
| <b>Family size</b>                   |         |         |               |
| 1 – 5                                | 1.00    | -       | (-)           |
| >5                                   | 3.54    | 0.001   | (3.07 – 4.08) |
| <b>Sanitation</b>                    |         |         |               |
| Good toilet                          | 1.00    | -       | (-)           |
| Bad toilet                           | 1.77    | 0.001   | (1.46 – 2.14) |
| <b>Fuel source</b>                   |         |         |               |
| Gas                                  | 1.00    | -       | (-)           |
| Kerosene                             | 0.52    | 0.001   | (0.44 – 0.63) |
| Others                               | 0.28    | 0.001   | (0.23 – 0.34) |
| <b>Wealth index</b>                  |         |         |               |
| Poor                                 | 1.00    | -       | (-)           |
| Rich                                 | ***     | ***     | (-)           |
| <b>Water source</b>                  |         |         |               |
| Unsafe water                         | 1.00    | -       | (-)           |
| Safe water                           | ***     | ***     | (-)           |
| <b>No of wives</b>                   |         |         |               |
| One wife                             | 1.00    | -       | (-)           |
| More wives                           | 1.47    | 0.001   | (1.30 – 1.66) |
| <b>Paternal occupation</b>           |         |         |               |
| Business / cleric                    | 1.00    | -       | (-)           |
| Farming                              | 0.82    | 0.121   | (0.64 – 1.05) |
| Manual                               | 0.87    | 0.328   | (0.67 – 1.14) |
| <b>Other factors</b>                 |         |         |               |
| <b>Residence</b>                     |         |         |               |
| Urban                                | 1.00    | -       | (-)           |
| Rural                                | 1.53    | 0.002   | (1.16 – 2.00) |
| <b>Regions</b>                       |         |         |               |
| North central                        | 1.00    | -       | (-)           |
| North east                           | 0.75    | 0.514   | (0.31 – 1.78) |
| North west                           | 0.67    | 0.366   | (0.28 – 1.60) |
| South east                           | 0.36    | 0.001   | (0.32 – 0.42) |
| South west                           | 0.99    | 0.497   | (0.67 – 1.22) |
| South south                          | 0.96    | 0.583   | (0.83 – 1.11) |

\*\*\* means variables omitted by StataIC 11 software package
